# Supplementary material for: Blockade of mGluR5 in astrocytes derived from human iPSCs modulates astrocytic function and increases phagocytosis
Source: PubMed Central journal article supplement (PMC10749358; doi:10.3389/fimmu.2023.1283331), 2023-12-11
Supplement: DataSheet_1.pdf [file DataSheet_1.pdf]

## Supplementary Material

### 1 Supplementary Figures

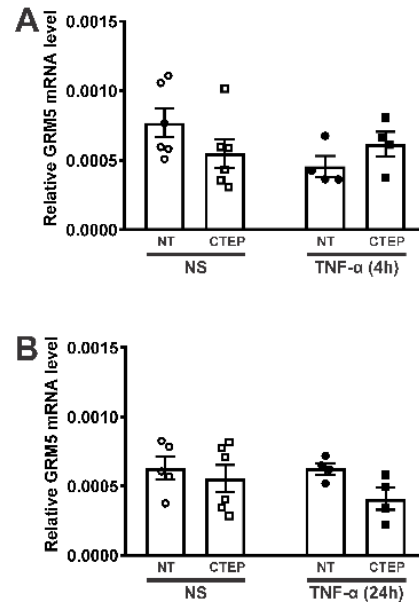

**Figure S1:** mGluR5 expression in hiPSC-derived astrocytes. Graphs show mRNA levels of mGluR5 (GRM5) in hiPSC-derived astrocytes that were either unstimulated (NS) or stimulated with rTNF- $\alpha$  10 ng/mL and treated with either vehicle (NT) or CTEP 10  $\mu$ M for either 4 h (A) or 24 h (B). mRNA levels were assessed by quantitative RT-PCR, which was performed in triplicates and normalized to the average of *RPLP0* and *IPO8* mRNA levels. Data represents the means  $\pm$  SEM, n=4-6.

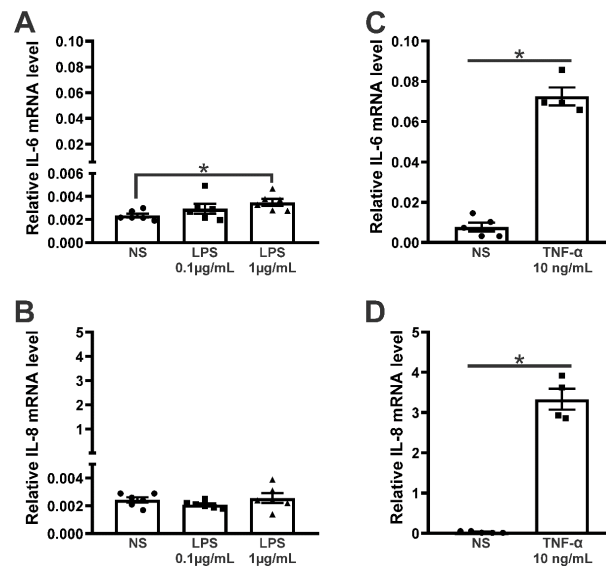

**Figure S2:** Expression of cytokines by hiPSC-derived astrocytes upon stimulation with LPS and rTNF- $\alpha$ . Graphs show mRNA levels of IL-6 (A) and IL-8 (B) in hiPSC-derived astrocytes that were either unstimulated (NS) or stimulated with LPS 0.1 or 1  $\mu\text{g}/\text{mL}$  for 24 h. Graphs show mRNA levels of IL-6 (A) and IL-8 (B) in hiPSC-derived astrocytes that were either unstimulated (NS) or stimulated with rTNF- $\alpha$  10 ng/mL for 24 h. mRNA levels were assessed by quantitative RT-PCR, which was performed in triplicates and normalized to the average of RPLP0 and IPO8 mRNA levels. Data represents the means  $\pm$  SEM, N=4-6.

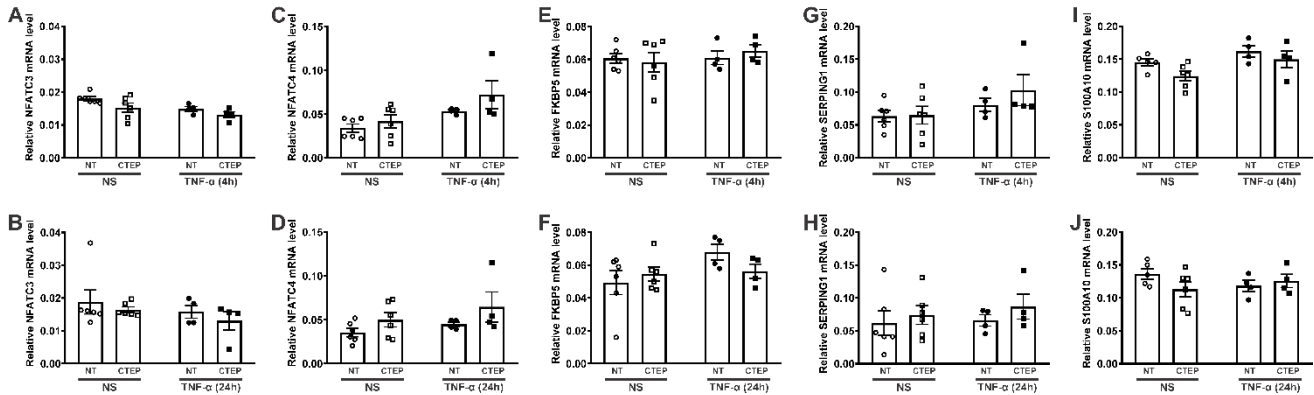

**Figure S3:** Expression of reactive astrocyte markers by hiPSC-derived astrocytes. Graphs show mRNA levels of NFATC3 (A), NFATC4 (C), FKBP5 (E), SERPING1 (G), and S100A10 (I) in hiPSC-derived astrocytes that were either unstimulated (NS) or stimulated with rTNF- $\alpha$  10 ng/mL and treated with either vehicle (NT) or CTEP 10  $\mu\text{M}$  for 4 h. Graphs show mRNA levels of NFATC3 (B), NFATC4 (D), FKBP5 (F), SERPING1 (H), and S100A10 (J) in hiPSC-derived astrocytes that were either unstimulated (NS) or stimulated with rTNF- $\alpha$  10 ng/mL and treated with either vehicle (NT) or CTEP 10  $\mu\text{M}$  for 24 h. mRNA levels were assessed by quantitative RT-PCR, which was performed in triplicates and normalized to the average of RPLP0 and IPO8 mRNA levels. Data represents the means  $\pm$  SEM, N=4-6.

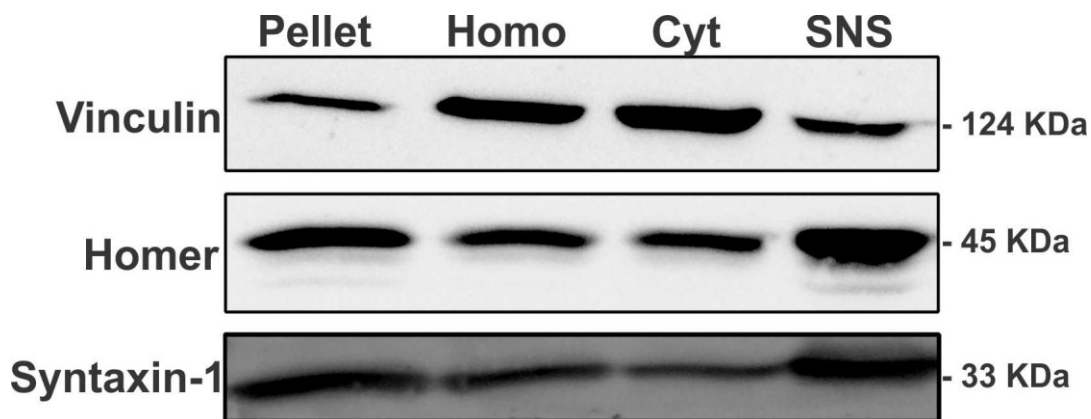

**Figure S4:** Synaptoneurosomes isolated from mouse brain are enriched in pre- and post-synaptic markers. Shown are immunoblots for vinculin (upper panel), Homer (middle panel) and syntaxin-1 (lower panel) expression in synaptoneurosomes preparation fractions, including pellet, homogenate (Homo), cytosolic (Cyt) and synaptoneurosomes (SNS).

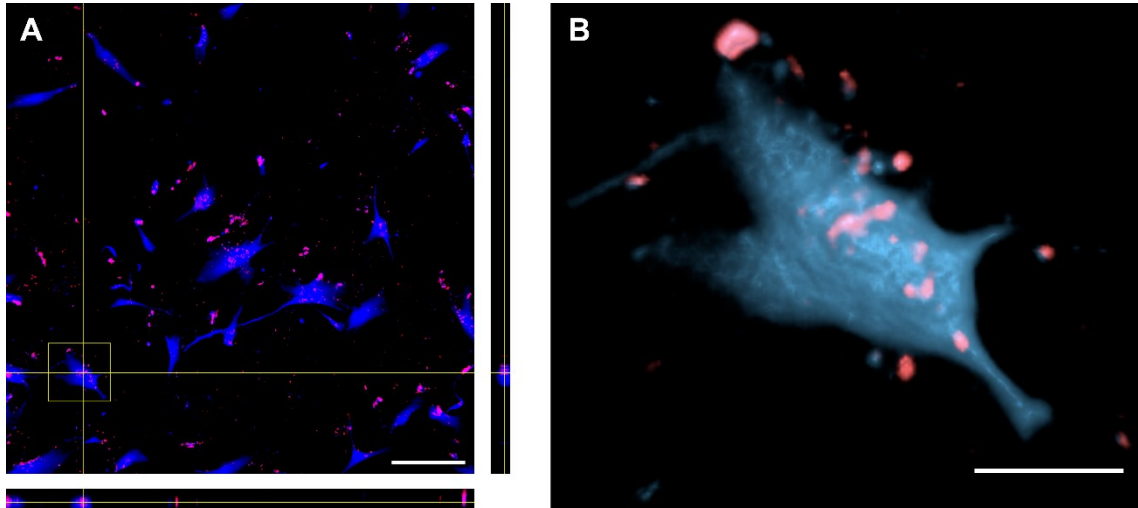

**Figure S5:** hiPSC-derived astrocytes phagocytose synaptoneurosomes. Shown are orthogonal projection of z-series (A) and 3D renderization (B) of astrocyte highlighted in (A) from confocal micrographs of hiPSC-derived astrocytes labelled with CellTracker blue and synpatoneurosomes labelled with Vybrant CM-Dil (red). Scale bar in (A)=200  $\mu$ m and in (B)=50  $\mu$ m.
